# Supplementary material for: Occurrence of Cryptosporidium Oocysts in Leisure Pools in the UK, 2017, and Modelling of Oocyst Contamination Events
Source: MDPI journal article supplement (doi:10.3390/w13111503), 2021-05-27
Supplement: s1 [file s1]

Archive with 2 entries (2 files):
- Supplementary material for Zip/Figure S1 Standardised form for data collection at the time of sampling.pdf
- Supplementary material for Zip/Table S1 Pool water sampling data.xlsx
