# Supplementary material for: Occurrence of Cryptosporidium Oocysts in Leisure Pools in the UK, 2017, and Modelling of Oocyst Contamination Events
Source: MDPI journal article supplement (doi:10.3390/w13111503), 2021-05-27
Supplement: s1 [file s1 › Supplementary material for Zip/Figure S1 Standardised form for data collection at the time of sampling.pdf]

**Weekly checklist and  
record sheet for project  
sampling**

**DATE:** \_\_\_\_\_

Please scan and send the completed checklist within 2 days to:  
rachel.chalmers@wales.nhs.uk and Rob.Johnston@phe.gov.uk (or post to Rachel)

**PREMISES DETAILS**

|                                                             |                            |  |
|-------------------------------------------------------------|----------------------------|--|
| <b>Name of Premises<br/>Person completing this<br/>form</b> |                            |  |
|                                                             | <b>Name</b>                |  |
|                                                             | <b>Position</b>            |  |
|                                                             | <b>Contact<br/>details</b> |  |

**CRYPTOSPORIDIUM SAMPLING INFORMATION.**

Sample according to the Cryptosporidium sampling protocol; a courier will pick up on Wednesday morning to deliver to IDEXX lab.

|                                         |               |
|-----------------------------------------|---------------|
| <b>Time filtration started</b>          |               |
| <b>Meter reading at start</b>           |               |
| <b>Time filtration stopped</b>          |               |
| <b>Meter reading at end</b>             |               |
| <b>Volume filtered (L)</b>              |               |
| <b>Flow rate</b>                        |               |
| <b>Sampling comments:</b>               |               |
| <b>Was a backwash sample<br/>taken?</b> | <b>Yes/No</b> |

**POOL TESTS AT THE TIME OF SAMPLING.**

Use a 250 ml bacti bottle supplied by Latis Scientific to take a bacti sample according to the bacti and chemicals protocol; a courier will pick up the bacti sample on Tuesday afternoon. Use a chemicals testing pot to take a sample from the pool and test by your normal protocol except turbidity.

**Measure:**

**Result:**

|                                                                               |  |
|-------------------------------------------------------------------------------|--|
| <b>Temperature of the pool water<br/>How was this measured?</b>               |  |
| <b>pH<br/>How was this measured?</b>                                          |  |
| <b>Total chlorine or bromine residual<br/>mg/L<br/>How was this measured?</b> |  |
| <b>Free chlorine mg/L<br/>How was this measured?</b>                          |  |



**MATTERS OF EVIDENT CONCERN**

List any matters of evident concern this week re: pool, treatment or users together with any action taken
