# Supplementary material for: Occurrence of Cryptosporidium Oocysts in Leisure Pools in the UK, 2017, and Modelling of Oocyst Contamination Events
Source: MDPI journal article supplement (doi:10.3390/w13111503), 2021-05-27
Supplement: s1 [file s1 › Supplementary material for Zip/Table S1 Pool water sampling data.xlsx]

## Sheet: WEEKLY DATA ALL POOLS
Pool	Location	Setting	Disinfection	Date	Week	Start time	Start meter	Stop time	Minutes	Stop meter	Volume	Sample rate L / min	Oocysts detected	Oocyst count	OP 10L	OP10L adj	Backwash sampled	Filter backwash from	OP L	ACC	Coliforms	E coli	Ps aeruginosa	Pool temp oC	pH	Total mg/L	Free mg/L	Combined mg/L	TDS ppm	NTU	Appearance	#bathers	Bather groups	Ozone mg/L	UV mJ/cm2	Faecal Accidents	#AFR	Action AFR	Filters backwashed date 1	Date 1	Reason 1	Filters backwashed date 2	Date 2	Reason 2	Filters backwashed date 3	Date 3	Reason 3	Filters backwashed date 4	Date 4
A	England	Community	Bromine	2017-08-08	1	09:30:00	0	18:30:00	540	480.7	540.7	1.0013	YES	4	0.0739782	0.134997	Yes			S	S	S	S	30.5	8	6	3		1600	0.39	Darker/Green by depth	977	Casual swims, young, disabled			No	0		LP 1,2,3,4	2017-08-03		CP 1,2	2017-08-07	Scheduled/Pressure diff	LP 1,2,3,4	2017-08-08	Scheduled, Pressure diff
A	England	Community	Bromine	2017-08-15	2	09:30:00	0	22:30:00	780	492.3	492.3	0.631154	NO	0	0	0	Yes			S	S	S	S	30.5	8	14	2		1500	0.32		714	Toddlers, elderly, special needs			No	0
A	England	Community	Bromine	2017-08-22	3	10:30:00	0	21:30:00	660	992.1	992.1	1.50318	NO	0	0	0	Yes			U	S	S	S	30.5	7.9	9	1.6		1600	0.7	Clear (greenish tinge)	780	Toddlers, elderly, special needs			No	0	Area Cleared, Vomit removed as best as poss	LP 1,2,3,4,	2017-08-17	Schedled/Pressure diff	CP 1,2	2017-08-19	Scheduled/Pressure diff	LP 1,2,3,4	2017-08-22	Scheduled/Pressure diff
A	England	Community	Bromine	2017-08-29	4	09:45:00	0	17:45:00	480	572	572	1.19167	NO	0	0	0	Yes			S	S	S	S	30	8.1	4	3		1500	0.17		1000	General public, small group special needs			Yes	1	Water test undertaken, 2.5 chlorine ppm, 8.1ph at time of AFR	LP 1,2,3,4,	2017-08-23	Scheduled	CP 5,6	2017-08-24	Scheduled	LP 1,2,3,4	2017-08-28	Scheduled
A	England	Community	Bromine	2017-09-05	5	09:30:00	0	19:30:00	600	486.6	486.6	0.811	NO	0	0	0	No			S	S	S	S	30.5	7.6	4	1.5		1900	0.76	Clear (greenish tinge); minor foaming	1112	Toddlers, elderly, special needs			No	0		1,2,3,4	2017-08-30	Pressure differential	1,2,3,4	2017-09-03	Pressure differential
A	England	Community	Bromine	2017-09-12	6	09:30:00	0	18:30:00	540	566.1	566.1	1.04833	NO	0	0	0	No			S	S	S	S	30.5	7.4	8	2		1700	1.09	Clear, some faoming	595	Toddlers, elderly, special needs			Yes	1	Pool closed (end of session); chlorine 2 ppm; pH7.9	1,2,3,4	2017-09-07	Pressure differential
A	England	Community	Bromine	2017-09-19	7	09:30:00	0	17:35:00	485	562.7	562.7	1.16021	NO	0	0	0	No			U	S	S	S	30.5	7.8	8	1.5		1700	1.6	Lear, minor foaming clears in 3 secs	417	Toddlers, elderly, special needs			No	0		1,2,3,4	2017-09-13	Pressure differential
A	England	Community	Bromine	2017-09-26	8	09:30:00	0	19:30:00	600	687.2	687.2	1.14533	NO	0	0	0	No			U	S	S	S	30.5	7.7	8	2		1300	0.67	Clear	348	Toddlers, elderly, special needs			No	0		LP 1,2,3,4	2019-09-19	Pressure differential	LP 1,2,3,4	2017-09-21	Scheduled
A	England	Community	Bromine	2017-10-03	9	10:00:00	0	19:30:00	570	535.9	535.9	0.940175	NO	0	0	0	No			S	S	S	S	30.5	7.8	4	2.5		1200	0.25	Clear	134	Toddlers, elderly, special needs			No	0	Vomit: pool cleared 20 mins, child's health history checked verbally	LP 1,2,3,4	2017-09-30	Scheduled	LP 1,2,3,4	2017-10-02	Pressure differential
A	England	Community	Bromine	2017-10-10	10	09:30:00	0	22:09:00	759	521.4	521.4	0.686957	NO	0	0	0	No			S	S	S	S	30.5	7.7	4	2		1100	0.23	Clear	530	Toddlers, elderly, special needs			No	0		1,2,3,4	2017-10-01	Pressure differential	1,2,3,4	2017-10-05	Scheduled
C	Wales	Community	Chlorine	2017-08-08	1	08:00:00	23	21:30:00	810	163	140	0.17284	YES	5	0.357143	0.651721	No			U	S	S	S	31.4	7.2	1.51	2.13	0.62	740	1.08	Crystal Clear	210	Adults, children, babies		1	No	0		1	2017-08-02	Scheduled	2	2017-08-02	Pressure diff
C	Wales	Community	Chlorine	2017-08-15	2	06:00:00	0	22:00:00	960	60	60	0.0625	YES	1	0.166667	0.304136	No			S	S	S	S	31.6	7.4	1.5	1.9	0.7	760	0.3	Crystal Clear	288	Adults, children, babies		1.1	No	0		1	2017-08-09	Scheduled	2	2017-08-08	Pressure diff	2	2017-08-12	Scheduled
C	Wales	Community	Chlorine	2017-08-23	3	08:00:00	0	20:00:00	720	784	784	1.08889	NO	0	0	0	No			S	S	S	S	31.4	7.22	2.48	1.46	1.02	740	0.29	Crystal Clear	224	Adults, children, babies		1.05	Yes	1	Pool closed 16.45 (20.8.17) checked system, 12 hr turnover, backwashed, opened 15:30 (21.08.17)	1	2017-08-16	Scheduled	1	2017-08-21	Response after AFR	2	2017-08-21	Response after AFR
C	Wales	Community	Chlorine	2017-08-29	4	08:00:00	0	20:00:00	720	890.2	890.2	1.23639	NO	0	0	0	No			S	S	S	S	31.2	7.28	2.34	1.84	0.5	680	0.4	Crystal Clear	205	Adults, children, babies		1.15	Yes	1	Pool closed 17.15 (29.8.17) customers asked to shower, remove stool, checked system and parameters opened 17:45 (29.08.17)	1	2017-08-23	Scheduled	2	2017-08-26	Scheduled
C	Wales	Community	Chlorine	2017-09-05	5	08:00:00	0	20:00:00	720	712	712	0.988889	NO	0	0	0	No			U	S	S	S	31.6	7.3	2.45	1.9	0.55	527	0.35	Crystal Clear	199	Adults, children, babies		1.1	No	0		2	2017-08-29	Pressure differential	1	2017-08-30	Scheduled
C	Wales	Community	Chlorine	2017-09-12	6	08:00:00	0	20:00:00	720	640	640	0.888889	NO	0	0	0	No			S	S	S	S	31.7	7.2	2.58	1.76	0.82	600	0.4	Crystal Clear	222	Adults, children, babies		1.09	Yes	1	Pool closed from 18:30 on 10/09/17, turnover for 12 h, backwashed, 06:30 11/09/17, reopened 3:30pm	2	2017-09-06	Scheduled	1	2017-09-09	Scheduled	2	2017-09-11	Response	1	2017-09-11
C	Wales	Community	Chlorine	2017-09-19	7	08:00:00	0	20:30:00	750	725	725	0.966667	NO	0	0	0	No			S	S	S	S	31.5	7.2	2.2	1.61	0.59	480	0.6	Crystal Clear	214	Adults, children, babies		1	Yes	1	Solid stool 16/09/17. Clear pool 30 mins, shower, checked parameters	1	2017-09-13	Scheduled	2	2017-09-17	Scheduled	1	2017-09-17	Pressure differential
C	Wales	Community	Chlorine	2017-09-26	8	08:00:00	0	20:30:00	750	819	819	1.092	NO	0	0	0	No			S	S	S	S	31.3	7.3	2.64	1.94	0.7	620	0.5	Crystal Clear	220	Adults, children, babies		1	No	0		1	2017-09-19	Scheduled	2	2017-09-22	Scheduled
C	Wales	Community	Chlorine	2017-10-03	9	08:00:00	0	20:10:00	730	916	916	1.25479	NO	0	0	0	No			S	S	S	S	31.4	7.3	2.99	2.08	0.91	460	0.6	Clear	216	Adults, children, babies		1	No	0		1	2017-09-27	Scheduled	2	2017-09-30	Scheduled
C	Wales	Community	Chlorine	2017-10-10	10	08:15:00	0	20:15:00	720	990	990	1.375	NO	0	0	0	No			S	S	S	S	31.5	7.2	2.21	1.63	0.58	495	0.5	Clear	222	Adults, children, babies		1.01	No	0		1	2017-10-04	Scheduled	2	2017-10-07
D	Scotland	Community	Chlorine	2017-08-08	1	06:30:00	1044.6	20:13:00	823	1719.3	674.7	0.819806	NO	0	0	0	Yes	3	0	S	S	S	S	30	7.35	2.32	1.98	0.34	2600	0.36	Clear	140	Mixed		123	No	0		1,2,3,4,5	2017-08-06	Scheduled	1,2,3		Pressure diff	3	2017-08-01	Crypto pools project
D	Scotland	Community	Chlorine	2017-08-15	2	06:15:00	1719.3	20:46:00	871	2046	326.7	0.375086	NO	0	0	0	Yes	3	0	S	S	S	S	30.3	7.35	1.46	1.1	0.36	1400	0.41	Clear	67	Varied		130	No	0		3	2017-08-08	Crypto pools project	1,2,3	2017-08-10	Pressure diff	1,2,3,4,5	2017-08-13	Scheduled
D	Scotland	Community	Chlorine	2017-08-22	3	06:30:00	2051.3	06:15:00	1425	2232.6	181.3	0.127228	NO	0	0	0	Yes	3	0	U	S	S	S	30.1	7.5	1.64	1.32	0.32	1500	0.2		40	Mixed		126	No	0		1,2,3,4,5	2017-08-15	Scheduled	1,2,3	2017-08-17	Pressure diff	3	2017-08-20	Crypto pools project
D	Scotland	Community	Chlorine	2017-08-29	4	06:25:00	2234.2	06:15:00	1430	2702.6	468.4	0.327552	NO	0	0	0	Yes	3	0	S	S	S	S	30.1	7.6	1.62	1.36	0.24	1400	2.4	Clear	30	Varied			No	0		1,2,3,4,5	2017-08-27	Scheduled	3	2017-08-23	Crypto pool project
D	Scotland	Community	Chlorine	2017-09-05	5	06:15:00	2702.8	06:15:00	1440	3598	895.2	0.621667	NO	0	0	0	Yes	3	0	S	S	S	S	30.2	7.5	2.02	1.82	0.2	1500	0.24	Clear	25	Varied.			No	0		1,2,3,4,5	2017-09-03	Scheduled	3	2017-08-30	Project
D	Scotland	Community	Chlorine	2017-09-12	6	06:30:00	3599.1	06:20:00	1430	4402.7	803.6	0.561958	NO	0	0	0	Yes	3	0	S	S	S	S	30	7.5	1.84	1.58	0.26	1500	0.24		12	Various		134	No	0		1,2,3,4,5	2017-09-10	Scheduled	3	2017-09-06	Crypto pools project
D	Scotland	Community	Chlorine	2017-09-19	7	05:45:00	4403.1	05:45:00	1440	4897.9	494.8	0.343611	NO	0	0	0	Yes	3	0	U	S	S	S	29.8	7.45	1.38	1.24	0.14	1400	0.18	Clear	31	Various		134	Yes	1	Solid stool 18/09/17. Child identified, cleared pool, contamination removed.	1,2,3,4,5	2017-09-17	Scheduled	3	2017-09-13	Project
D	Scotland	Community	Chlorine	2017-09-26	8	06:30:00	4897	07:00:00	1470	5561	664	0.451701	NO	0	0	0	Yes	3	0	S	S	S	S	30.2	7.5	1.7	1.48	0.22	1500	0.34	Clear	25	Various		134	No	0		1,2,3,4,5	2017-09-24	Scheduled	3	2017-09-20	Crypto pools project
D	Scotland	Community	Chlorine	2017-10-03	9	06:20:00	5562.3	07:00:00	1480	6179	616.7	0.416689	NO	0	0	0	Yes	3	0	S	S	S	S	30.2	7.55	1.56	1.32	0.24	1500	0.07	Clear	20	Various		134	Yes	1	Area cleared, stool removed using net, pH adjusted	1,2,3,4,5,	2017-09-24	Scheduled	3	2017-09-27	Crypto pools project
D	Scotland	Community	Chlorine	2017-10-10	10	05:30:00	6179.3	05:30:00	1440	7178.6	999.3	0.693958	YES	1	0.010007	0.018261	Yes	3	0	S	S	S	S	30.1	7.55	2.02	1.8	0.22	1300	0.24	Clear	600	Various- School Holidays		134	No	0		1,2,3,4,5	2017-10-08	Scheduled	3	2017-10-04	Crypto pools project
F	England	Holiday park	Chlorine	2017-08-10	1	08:00:00	0	16:00:00	480	201.4	201.4	0.419583	NO	0	0	0	Yes		0	S	S	S	S	30.2	7.35	2.5	1.8	0.7	2800	1.37	Clear	2500	Owners + Holiday Guests			No	0		1,2,3	2017-08-01	Bather volume/Pressure	1,2,3	2017-08-02	Bather volume/pressure	1,2,3	2017-08-03	Bather volume/Pressure
F	England	Holiday park	Chlorine	2017-08-15	2	08:00:00	202	16:00:00	480		200	0.416667	NO	0	0	0	Yes		0	U	S	S	S	30.9	7.4	3.8	1.88	1.92	1775	0.6	Very Clear	1700	Holidays/Owners			No	0		1,2,3	2017-08-09	Bather volume/Pressure	1,2,3	2017-08-10	Bather volume/pressure	1,2,3	2017-08-11	Bather volume/Pressure
F	England	Holiday park	Chlorine	2017-08-22	3	08:00:00		16:00:00	480		200	0.416667		void			Yes		void	VOID	VOID	VOID	VOID	30.7	7.21	3.1	2.15	0.95	1818	1.24	Good clarity	2000	Holidays/Owners			No	0	2 vomit	1,2,3	2017-08-20	Pressure reading	1,2,3,	2017-08-21	pressure reading	1,2,3	2017-08-22	pressure reading
F	England	Holiday park	Chlorine	2017-08-29	4	08:00:00	0	16:00:00	480	199	199	0.414583	YES	23	1.15578	2.10909	Yes		4	VOID	S	S	S	30.5	7.7	4.5	2.3	2.2	1640	0.24	Clear	2000	Holiday makers/Owners			No	0		1,2,3	2017-08-28	High pressure	1,2,3	2017-08-27	High pressure	1,2,3	2017-08-26	High pressure
F	England	Holiday park	Chlorine	2017-09-05	5	08:00:00	0	16:00:00	480		200	0.416667	NO	0	0	0	Yes		0	S	S	S	S	30.1	7.25	3.8	2.2	1.6	1508	0.72	Very clean & Clear	900	Holidays/Owners			No	0	Vomit Net/ Clean	1,2,3	2017-09-04	Bather volume/Pressure	1,2,3	2017-09-03	Bather volume/pressure	1,2,3	2017-09-02	Bather volume/Pressure
F	England	Holiday park	Chlorine	2017-09-12	6	08:00:00	0	16:00:00	480		200	0.416667	YES	1	0.05	0.0912409	Yes		0	U	S	S	S	30.1	7.3	2.1	1.5	0.6	1515	0.89	Very clean and clear	200	Guests/Holidays/Owners			Yes	1		1	2017-09-06	Pressures	2	2017-09-07	pressures	1,3	08/09/17	pressures	2	2017-09-09
F	England	Holiday park	Chlorine	2017-09-19	7	08:00:00	0	16:00:00	480		200	0.416667	NO	0	0	0	Yes		0	S	S	S	S	31.3	7.2	3.1	1.23	1.87	1464	0.59	Very clear and clean	300	Guests/Holidays/Owners			No	0		1,2,3	2017-09-19	Pressures and daily usage	1,2,3	2017-09-18	Pressures and daily usage	1,2,3	2017-09-17	Pressures and daily usage	1,2,3	2017-09-16
F	England	Holiday park	Chlorine	2017-09-26	8	08:00:00		16:00:00	480		246	0.5125	NO	0	0	0	Yes		0	S	S	S	S	30.8	7.55	0.65	1.45	2.1	1414	0.53	Very clean & clear	120	Holidays/Owners			No	0		1	2017-09-20	Pressure/usage	2,3	2017-09-21	Pressures/usage	1,2,3	2017-09-23	Pressure/usage	1,3	2017-09-24
F	England	Holiday park	Chlorine	2017-10-03	9	08:00:00		16:00:00	480		240	0.5	NO	0	0	0	Yes		0	S	S	S	S	31	7.4	2.5	1.7	0.7	1404	0.36	Sparkling	75	Holidays/Owners			No	0			2017-09-29	Pressure/usage		2017-09-30	Pressure/Usage		2017-10-01	Pressure/usage		2017-10-02
F	England	Holiday park	Chlorine	2017-10-10	10	08:00:00		16:00:00	480		240	0.5	YES	4	0.166667	0.304136	Yes		void	S	S	S	S	31	7.25	3.2	1.74	1.46	1397	0.22	Sparkling	140	Holidays/Owners			No	0	vomit on Saturday	1,2,3	2017-10-04	Usage/Pressure	1	2017-10-05	Usage/Pressure	2	2017-10-07	Usage/Pressure	1,2,3	08/1017
B	England	Holiday park	Bromine	2017-08-08	1	09:00:00	0	17:00:00	480	238.4	238.4	0.496667	NO	0	0	0	No			S	S	S	S	30	8.05	5.44	1.76		1500	0.34	Acceptable	3929	Adults, children, babies, elderly			Yes	2	Solid stool removed. Pool closed for period of time.	12,1,2	2017-08-01	Scheduled	3,5,6	2017-08-02	Scheduled	7,8,9	2017-08-03	Scheduled
B	England	Holiday park	Bromine	2017-08-15	2	09:00:00	238.4	17:00:00	480	665.9	427.5	0.890625	NO	0	0	0	No			VOID	S	S	S	30	8.05	5.96	1.54		1500	0.41	Acceptable	4056	Adults, children, babies, elderly			No	0		6,7,8	2017-08-10	Scheduled	9,10,11	2017-08-11	Scheduled	12,1,2	2017-08-12	Scheduled
B	England	Holiday park	Bromine	2017-08-22	3	09:00:00	0	17:00:00	480	601.7	601.7	1.25354	YES	19	0.315772	0.576226	No			U	S	S	S	30	8.05	5.96	2.1		1600	0.19	Acceptable	3797	Adults, children, babies, elderly			No	0		1,2,3	2017-08-19	Scheduled	5,6,7	2017-08-20	Scheduled	8,9,10	2017-08-21	Scheduled
B	England	Holiday park	Bromine	2017-08-29	4	09:00:00		17:00:00	480		564	1.175	NO	0	0	0	No			S	S	S	S	30	7.95	5.96	1.92		1600	0.21	Acceptable	4024	Adults, children, babies, elderly			No	0		7,8,9	2017-08-28	Scheduled	10,11,12	2017-08-29	Scheduled	1,2,3	2017-08-29	Scheduled
B	England	Holiday park	Bromine	2017-09-05	5	09:00:00	0	17:00:00	480	460.9	460.9	0.960208	NO	0	0	0	No			U	S	S	S	30	7.85	7	2		1400	0.21	Acceptable	2564	Adults, children, babies, elderly			Yes	1	Solid stool removed, pool closed for 30 mins	12,1,2	2018-09-07	Scheduled	3,5,6	2017-09-08	Scheduled	7,8	2017-09-09	Scheduled
B	England	Holiday park	Bromine	2017-09-12	6	09:00:00	0	17:00:00	480	470.6	470.6	0.980417	NO	0	0	0	No			S	S	S	S	30	7.9	5.4	2		1400	0.23	Acceptable	2053	Adults, children, babies, elderly			Yes	1	Solid stool removed. Pool closed for 30 min.	10,11	2017-09-16	Scheduled	1,12	2017-09-17	Scheduled	2,3	2017-09-18	Scheduled
B	England	Holiday park	Bromine	2017-09-19	7	09:00:00	470.6	17:00:00	480	1158	687.4	1.43208	NO	0	0	0	No			S	S	S	S	30	7.95	5.52	1.98		1400	0.19	Clarity and appearance acceptable	1869	Adults, children, babies, elderly			No	0		5,6	2017-09-13	Scheduled	7,8	2017-09-14	Scheduled	9,10	2017-09-15	Scheduled	11,12	2017-09-16
B	England	Holiday park	Bromine	2017-09-26	8	09:00:00	1158	17:00:00	480	1737	579	1.20625	NO	0	0	0	No			S	S	S	S	30	7.9	6.32	1.78		1320	0.15	Acceptable	1356	Adults, children, babies, elderly			No	0		6,7	2017-09-19	Scheduled	8,9	2017-09-20	Scheduled	10,11	2017-09-21	Scheduled	12,1	2017-09-22
B	England	Holiday park	Bromine	2017-10-03	9	09:00:00	1737	17:00:00	480	2113	376	0.783333	NO	0	0	0	No			S	S	S	S	30	7.9	5.1	2.1		1290	0.09	Acceptable	1223	Adults, children, babies, elderly			No	0		9,10	2017-09-26	Scheduled	11,12	2017-09-27	Scheduled	1,2	2017-09-28	Scheduled	3,5	2017-09-29
B	England	Holiday park	Bromine	2017-10-10	10	09:00:00	2113	17:00:00	480	2558	445	0.927083	NO	0	0	0	No			S	S	S	S	30	7.9	5.5	2		1200	0.19	Acceptable	1987	Adults, children, babies, elderly			No	0		3,5	2017-10-10	Scheduled	6,7	2017-10-11	Scheduled	8,9	2017-10-12	Scheduled	10,11	2017-10-13
E	Wales	Community	Chlorine	2017-08-08	1	08:10:00	3610.8	16:11:00	481	3899.4	288.6	0.6	NO	0	0	0	Yes	7	0	U	S	S	S	29.7	7.15	2.3	1.88	0.42	1242	0.23	Clear	at least 32; estimated 3000	Adults, children, baby		75	Yes	1	Solids removed, cleared pool, reopened after checking Cl	7	2017-08-02	Scheduled	8	2017-08-03	Scheduled	9	2017-08-04	Scheduled
E	Wales	Community	Chlorine	2017-08-15	2	08:10:00	3927.7	16:08:00	478	4612.1	684.4	1.4318	YES	6	0.087668	0.159978	Yes	2	0	S	S	S	S	29.8	7.4	3.6	3.2	0.4	1252	0.3	Clear	313; estimated 3000	Adults, children, baby		83	nO	0		9	2017-08-09	Scheduled	1,2	2017-08-10	Scheduled	3,4	2017-08-11	Scheduled
E	Wales	Community	Chlorine	2017-08-22	3	08:15:00	4615.2	16:20:00	485	5163	547.8	1.12948	YES	2	0.0365097	0.0666235	Yes	6	0	S	S	S	S	30.1	7.35	2.6	2.2	0.4	1340	0.39	Clear	297; estimated 3000	Adults/Children/Babies		78	No	0	16:00 pool closed 10 mins	3,4	2017-08-16	Scheduled	5,6	2017-08-17	Scheduled	7,8	2017-08-18	Scheduled
E	Wales	Community	Chlorine	2017-08-29	4	08:05:00	6290	16:15:00	490	6776.4	486.4	0.992653	YES	2	0.0411184	0.0750336	Yes	9	1	S	S	S	S	30.7	7.5	1.88	2.3	0.42	1340	0.21	Clear	390; estimated 3000	Adults, children, babies		81	No	0		7,8	2017-08-23	Scheduled	9	2017-08-24	Scheduled	1,2	2017-08-25	Scheduled
E	Wales	Community	Chlorine	2017-09-05	5	08:10:00	12205	16:33:00	503	12722	517	1.02783	NO	0	0	0	Yes	2	0	S	S	S	S	30.6	7.3	2.6	2.4	0.2	1169	0.42	Clear	207; estimated 3000	Adults + Toddlers		81	No	0		1,2	2017-08-30	Scheduled	3,4	2017-08-31	Scheduled	5,6	2017-09-01	Scheduled
E	Wales	Community	Chlorine	2017-09-12	6	08:08:00	20107	16:13:00	485	20563	456	0.940206	NO	0	0	0	Yes	9	0	S	S	S	S	29.9	7.05	2	1.88	0.12	1340	0.18	Clear. Grouting clearly visible	23; estimated 3000	Mother and toddlers, babies, instructors		86	No	0		3	2017-09-06	Scheduled	4	2017-09-07	Scheduled	5	2017-09-08	Scheduled	6	2017-09-09
E	Wales	Community	Chlorine	2017-09-19	7	08:10:00	27510	16:13:00	483	27895	385	0.797101	NO	0	0	0	Yes	5	0	S	S	S	S	29.6	7.25	1.82	1.53	0.3	1340	0.2	Clear. Grouting clearly visible	6; estimated 3000	Adults and toddlers		83	No	0		9	2017-09-12	Scheduled	1	2017-09-13	Scheduled	2	2017-09-15	Scheduled	3	2017-09-17
E	Wales	Community	Chlorine	2017-09-26	8	08:05:00	27896	16:27:00	502	28671	475	0.946215	NO	0	0	0	Yes	8	0	S	S	S	S	30.5	7.55	7.3	3.1	4.2	1340	0.21	Water clear, grout cleary visible	25; estimated 3000	Adults, children		79	No	0		2	2017-09-20	Scheduled	3	2017-09-21	Scheduled	4	2017-09-22	Scheduled	5	2017-09-23
E	Wales	Community	Chlorine	2017-10-03	9	08:00:00	40301	21:17:00	797	40573	272	0.34128	NO	0	0	0	Yes	3?	0	S	S	S	S	30.1	7.45	2.6	2.4	0.2	1600	0.24	Clear	4; estimated 3000	Adults,young children		91	No	0		8	2017-09-26	Scheduled	9	2017-09-29	Scheduled	1	2017-09-30	Scheduled	2	2017-10-02
E	Wales	Community	Chlorine	2017-10-10	10	08:00:00	40573	16:05:00	485	40864	291	0.6	YES	1	0.0343643	0.0627085	Yes	6	0	S	S	S	S	30.6	7.25	1.98	1.62	0.36	1620	0.36	Clear	11; estimated 3000	2 adults, 1 child		86	No	0		3	2017-10-03		4	2017-10-06		5	2017-10-08		6	2017-10-10
[truncated: 11 more columns]
